# Supplementary material for: Adaptation of H9N2 AIV in guinea pigs enables efficient transmission by direct contact and inefficient transmission by respiratory droplets
Source: PubMed Central journal article supplement (PMC4639850; doi:10.1038/srep15928), 2015-11-10
Supplement: srep15928-s1.pdf [file srep15928-s1.pdf]

1 **Adaptation of H9N2 AIV in guinea pigs enables efficient transmission by direct**  
2 **contact and inefficient transmission by respiratory droplets**

3 Xiaoyu Sang<sup>1,2,3</sup>, Airong Wang<sup>2,4</sup>, Jie Ding<sup>2</sup>, Huihui Kong<sup>1</sup>, Xiaolong Gao<sup>1,2</sup>, Lin Li<sup>2,5</sup>,  
4 Tongjie Chai<sup>4</sup>, Yuanguo Li<sup>2</sup>, Kun Zhang<sup>2</sup>, Chengyu Wang<sup>2</sup>, Zhonghai Wan<sup>2</sup>, Geng Huang<sup>2</sup>,  
5 Tiecheng Wang<sup>2</sup>, Na Feng<sup>2,5</sup>, Xuexing Zheng<sup>2</sup>, Hualei Wang<sup>2</sup>, Yongkun Zhao<sup>2</sup>, Songtao  
6 Yang<sup>2</sup>, Jun Qian<sup>2,4,6</sup>, Guixue Hu<sup>5\*</sup>, Yuwei Gao<sup>2,4,6,7\*</sup>, Xianzhu Xia<sup>1,2,4,6,7\*</sup>

7 <sup>1</sup>Harbin Veterinary Research Institute, Chinese Academy of Agricultural Sciences, Harbin,  
8 150001, China

9 <sup>2</sup>Key Laboratory of Jilin Province for Zoonosis Prevention and Control, Military Veterinary  
10 Research Institute, Academy of Military Medical Sciences, Changchun, 130122, China

11 <sup>3</sup>College of Animal Science and Veterinary Medicine, Shenyang Agricultural University,  
12 Shenyang, 110866, China

13 <sup>4</sup>College of Animal Science and Veterinary Medicine, Shandong Agricultural University,  
14 Tai'an, 271000, China

15 <sup>5</sup>College of Animal Science and Technology, Jilin Agricultural University, Changchun,  
16 130000, China

17 <sup>6</sup>Changchun Veterinary Research Institute, Chinese Academy of Agricultural Sciences,  
18 Changchun, 130122, China

19 <sup>7</sup>Jiangsu Co-innovation Center for Prevention and Control of Important Animal Infectious  
20 Diseases and Zoonoses, Yangzhou, 225000, China

21 **\*Corresponding author.** Guixue Hu, huguixue901103@163.com, Yuwei Gao,

1 gaoyuwei@gmail.com, and Xianzhu Xia, 13944855500@163.com.

2

3 **Figure S1. Transmission of guinea pig-adapted H9N2 AIV by direct contact.** Direct  
4 contact-mediated transmission of guinea pig-adapted H9N2 virus was assessed using  
5 viruses generated after 9 serial passages (P9, panel a), 12 serial passages (P12, panel b) and  
6 15 serial passages (P15, panel c). Each line represents the virus titer for an individual  
7 animal. The dashed lines indicate the lower limit of detection.

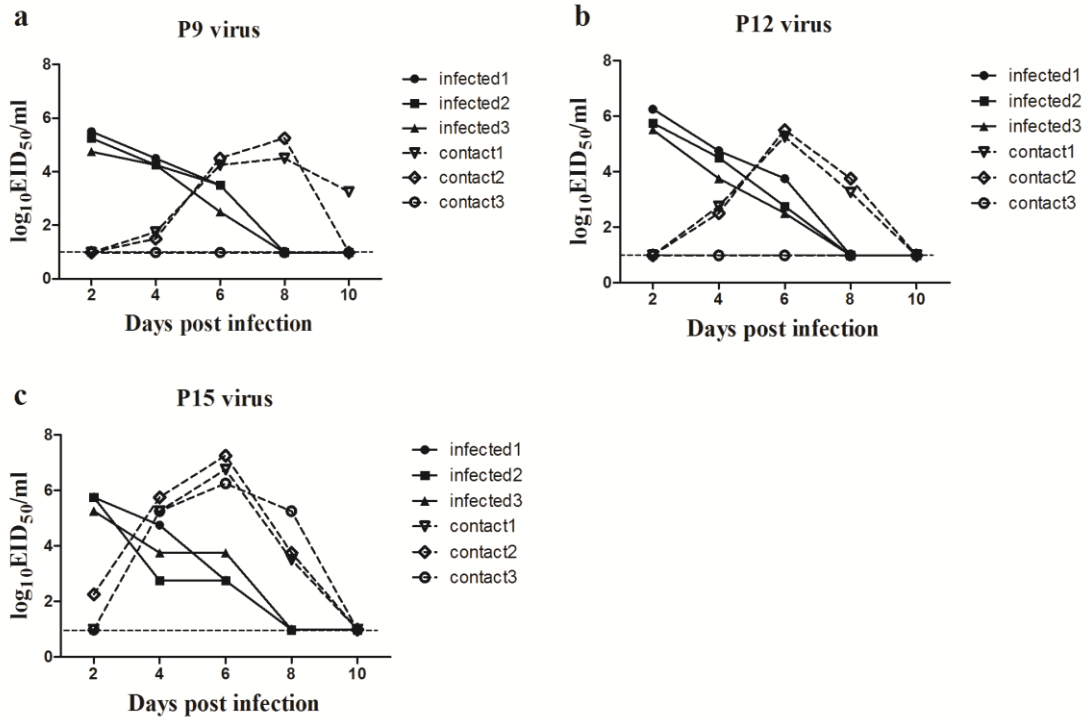

8
